# Supplementary material
Source: publisher site journal article supplement (https://www.dovepress.com/article/333147)

**Supplementary file**

**Supplementary Figure 1**

**Statistics on Missing Data**

**
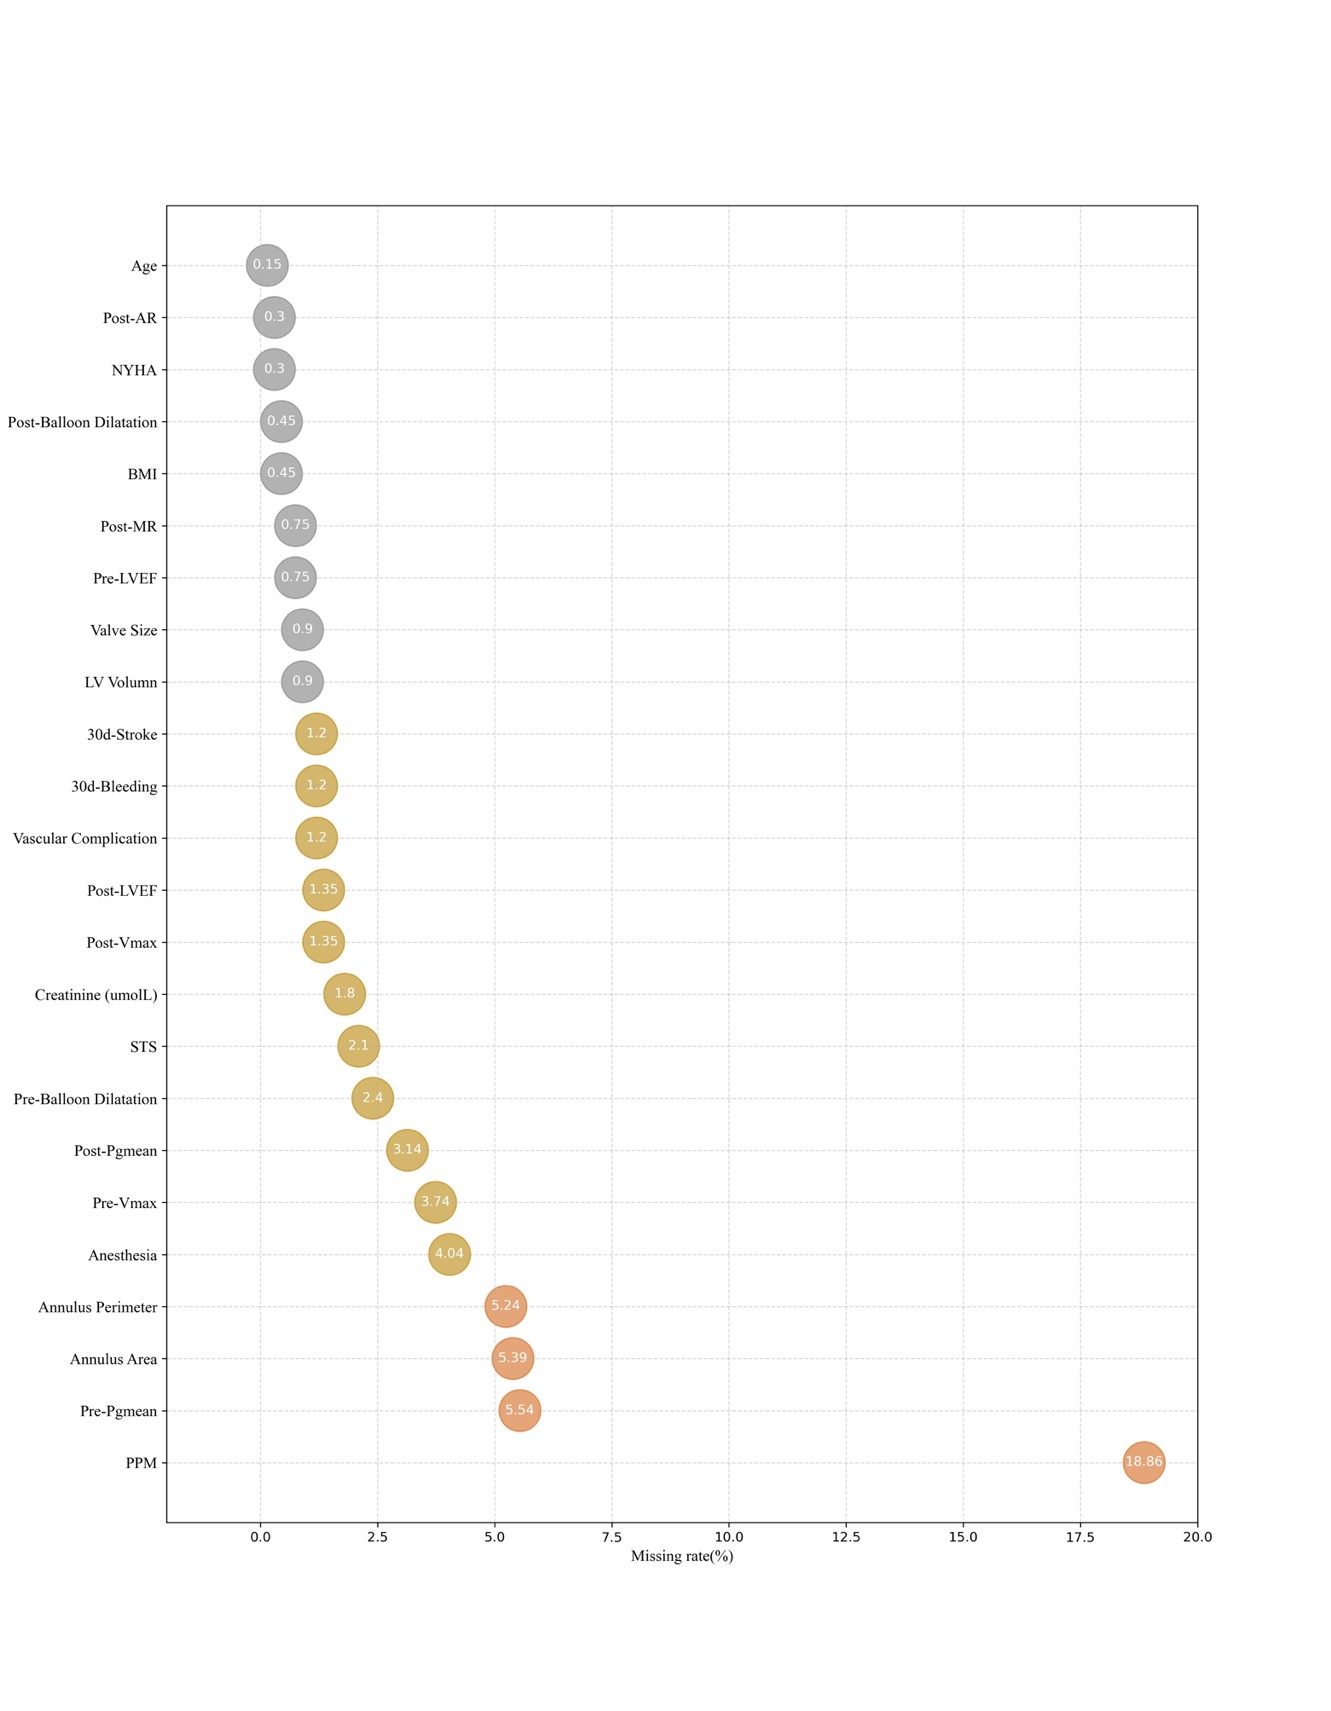
**All features had less than 20% of missing rate, of which PPM had the highest missing rate (18.86%), followed by pre-Pgmean (5.53%), annulus area (5.38%), anesthesia (4.04%). All other variables had little or no missing data (<3%). AR = aortic regurgitation; BMI = body mass index; LV = left ventricular; LVEF = left ventricular ejection fraction; MR = mitral regurgitation; NYHA = New York Heart Association; Pgmean = aortic valve mean gradient; PPM = Permanent pacemaker; STS = Society of Thoracic Surgeons.

**Supplementary Figure 2**

**Average Feature Importance Identified by Captum Interpretation Library.**

Feature importance in the proposed BLeNet model was evaluated by the Captum interpretation library. The average feature importance of all features was shown in A and B.

**
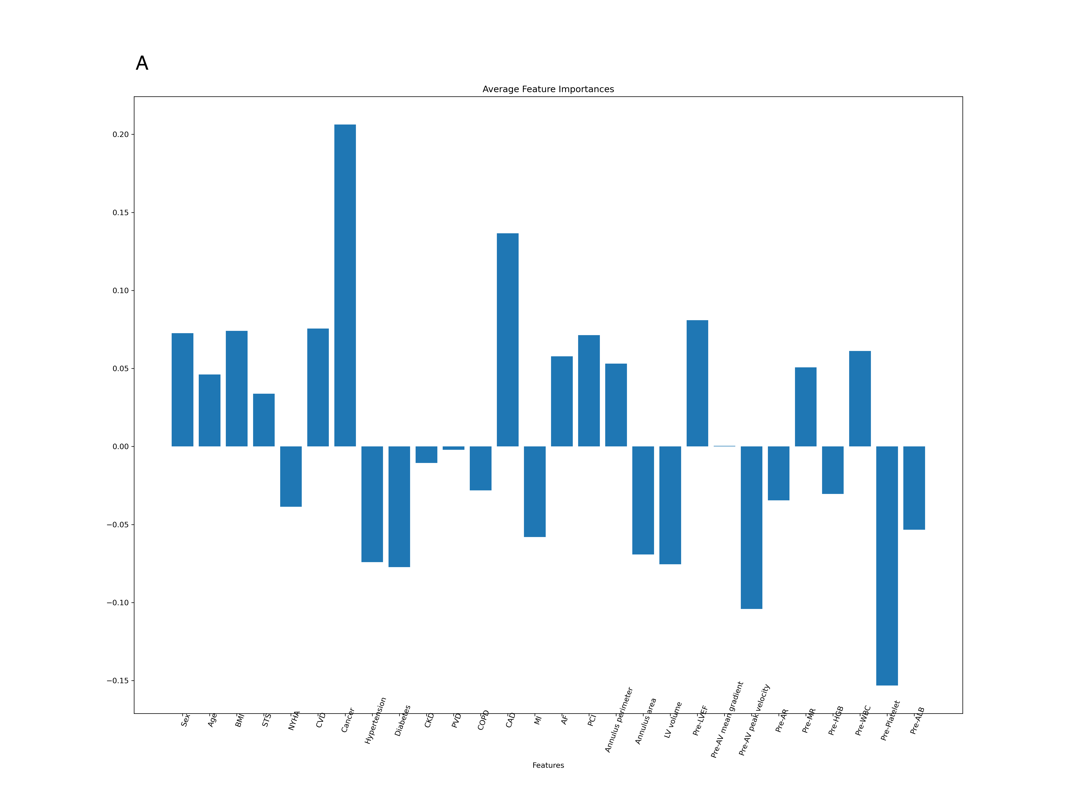
**

**
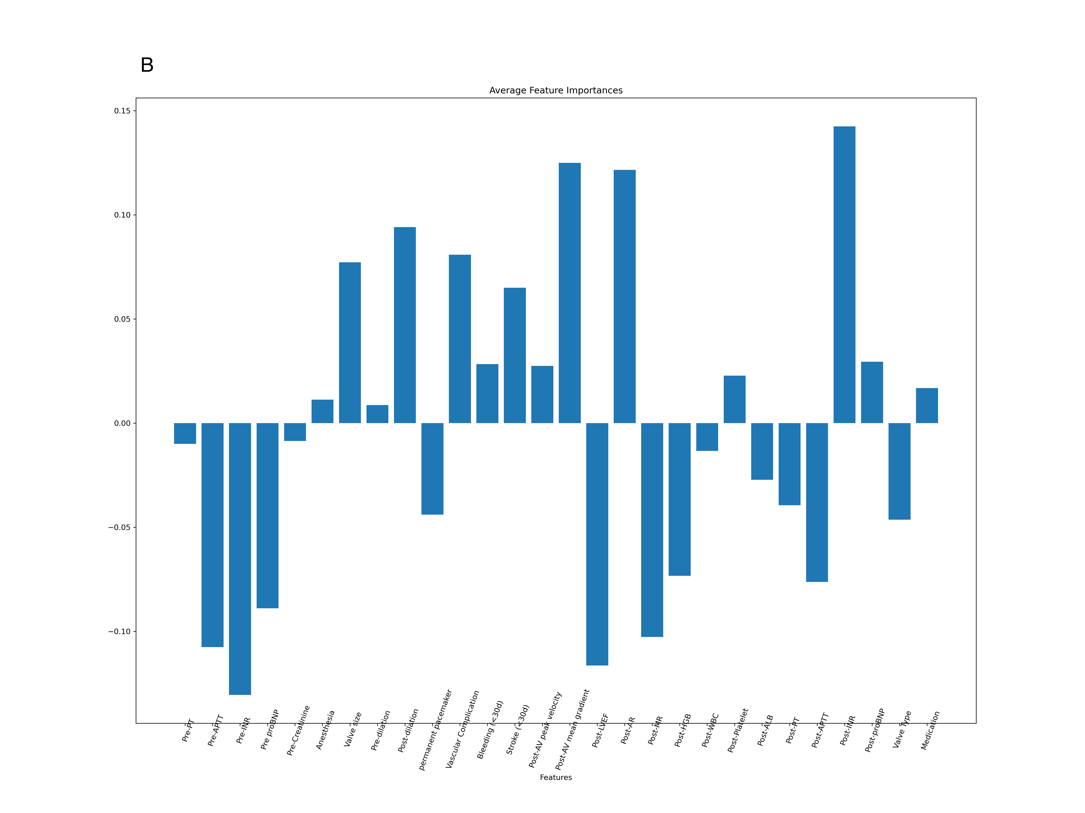
**

**Supplementary Figure 3**

**Comparison of Receiver Operating Characteristics Curve for BLeNet, Cox-PH and Random Survival Forest Models Built with the Same Features.**

The Cox-PH and random survival forest models here were built with the same features as the BLeNet model. RSF = random survival forest


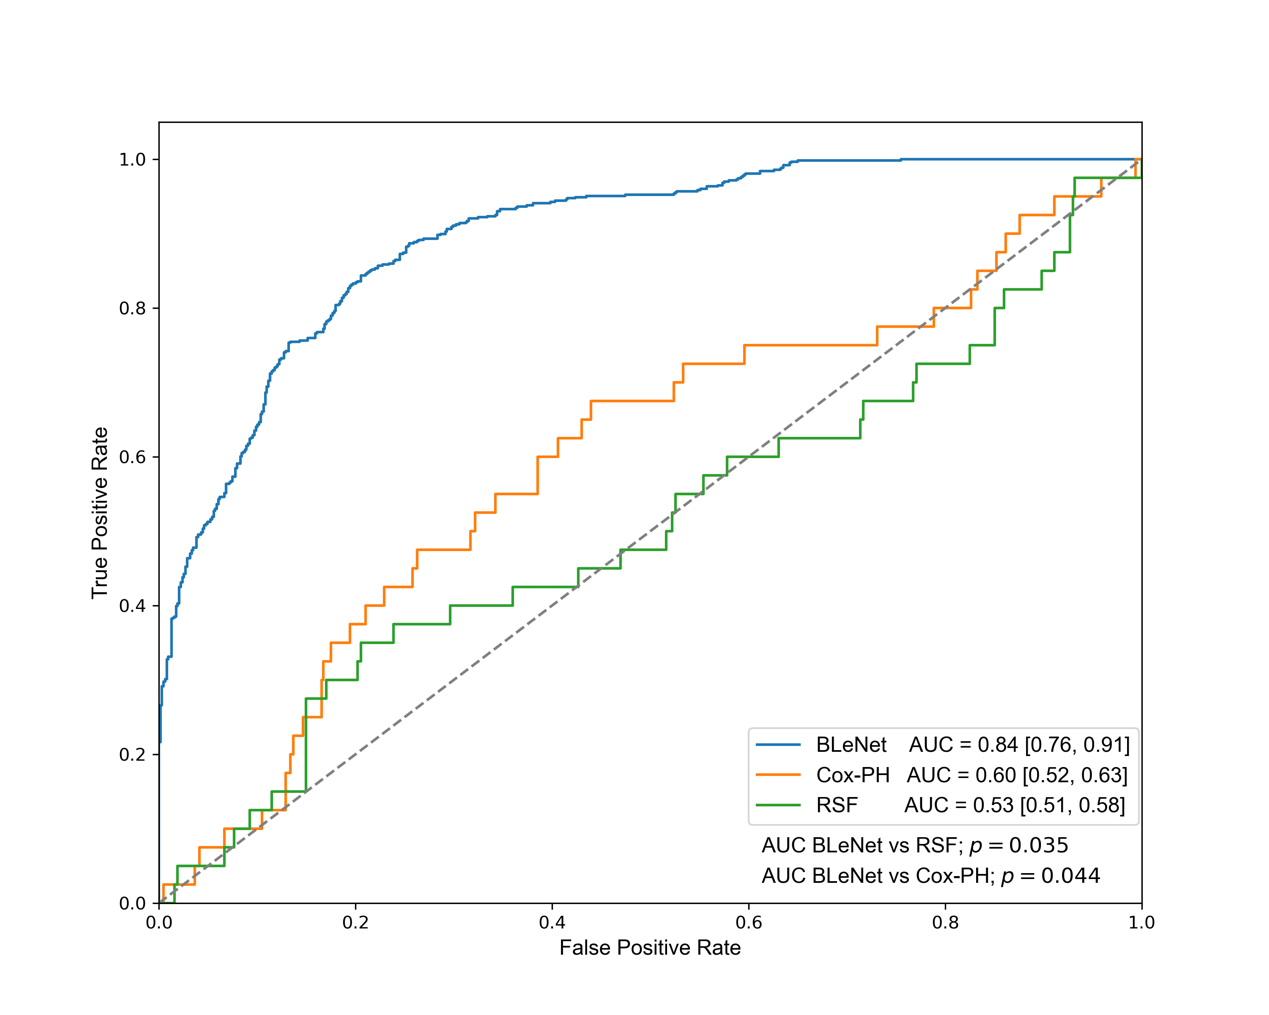

Supplement: Supplementary file 1 [file get_supplementary_file.php]
